# Supplementary material for: A comparative study on the photocatalytic degradation of organic dyes using hybridized 1T/2H, 1T/3R and 2H MoS2 nano-sheets
Source: Royal Society of Chemistry journal article supplement (doi:10.1039/c8ra05387a), 2018-01-01
Supplement: c8ra05387a1.pdf [file c8ra05387a1.pdf]

## Supporting information

### A Comparative Study on the Photocatalytic Degradation of Organic Dyes using Hybridized 1T/2H, 1T/3R and 2H MoS<sub>2</sub> Nano-sheets

Mohamed R. Saber,<sup>a</sup> Gomaa Khabiri,<sup>b</sup> Ahmed A. Maarouf,<sup>c</sup> Mathias Ulbricht,<sup>d</sup> Ahmed S. G. Khalil<sup>b\*</sup>

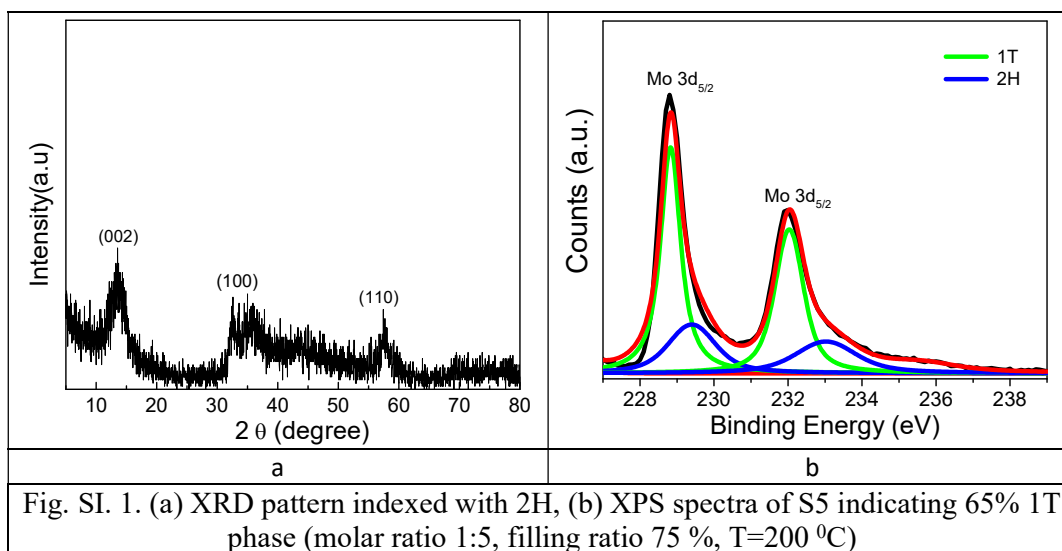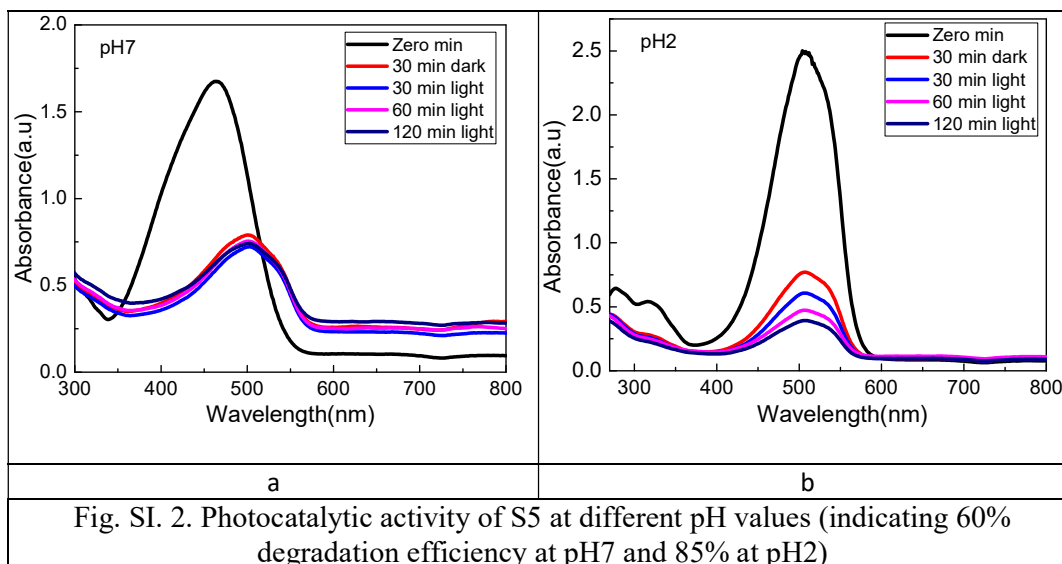

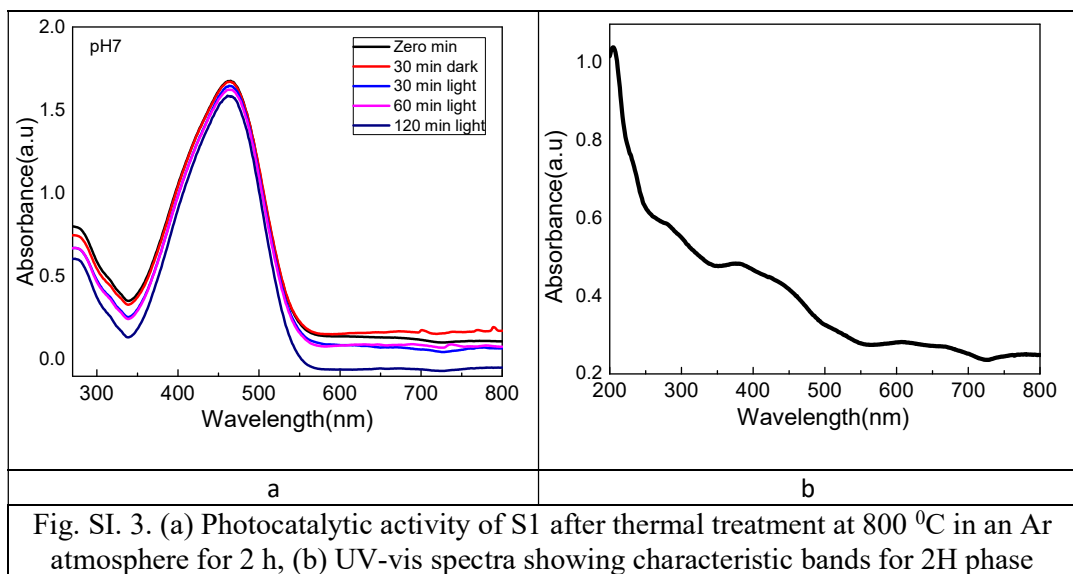

Fig. SI. 3. (a) Photocatalytic activity of S1 after thermal treatment at 800 °C in an Ar atmosphere for 2 h, (b) UV-vis spectra showing characteristic bands for 2H phase

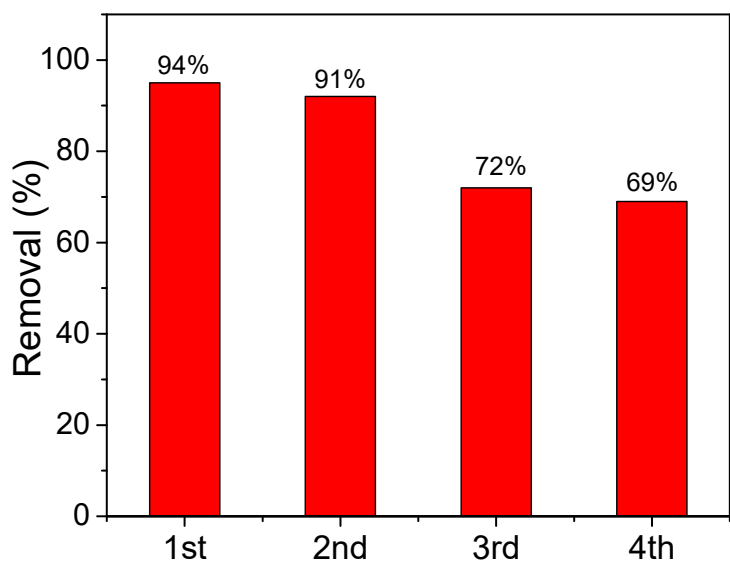

Fig. SI. 4. Removal efficiency of MO onto S1 after four successive cycles
